# Supplementary material
Source: Royal Society of Chemistry journal article supplement (doi:10.1039/d6gc01435f)
Supplement: d6gc01435f1.pdf [file d6gc01435f1.pdf]

## Supplementary Information

### **Achieving selective synthesis of N-benzylformamide via one-step electrocatalytic C-N coupling of CO<sub>2</sub> and benzylamine**

*Xiaoqian Gao, Chufan Li, Jingyan Liu, Shaohan Xu, Kuang Chen, and Guohua Zhao\**

School of Chemical Science and Engineering, Department of Thoracic Surgery,  
Shanghai Tongji Hospital, Tongji University, Shanghai 200092, P.R. China

\* Corresponding author.

Email: [g.zhao@tongji.edu.cn](mailto:g.zhao@tongji.edu.cn) (G. Zhao)

## **Experimental section**

### **Electrochemical measurements**

The linear sweep voltammetry (LSV) curves were conducted with the scan rate of  $50 \text{ mV s}^{-1}$  in the following solutions:  $\text{CO}_2$ -saturated  $0.1 \text{ M KHCO}_3$ , Ar-saturated  $0.1 \text{ M KHCO}_3$ ,  $\text{CO}_2$ -saturated  $0.1 \text{ M KHCO}_3$  containing  $0.1 \text{ M}$  benzylamine, Ar-saturated  $0.1 \text{ M KHCO}_3$  containing  $0.1 \text{ M}$  benzylamine. Double-layer capacitance (Cdl) measurements were conducted to calculate the electrochemically active surface area (ECSA), with cyclic voltammetry (CV) tests carried out at various scan rates ( $10$  to  $100 \text{ mV s}^{-1}$ ) in a  $0.1 \text{ M KHCO}_3$  solution.

### ***In situ* infrared spectroscopy measurements**

*In situ* electrochemical infrared spectroscopy measurements were conducted in external reflection mode using a custom quartz four-neck cell equipped with a  $\text{CaF}_2$  optical window. The catalyst ink was prepared by dispersing  $4 \text{ mg}$  catalyst in  $500 \mu\text{L}$  of a water/ethanol/Nafion mixture, and  $20 \mu\text{L}$  of the ink was dropped on a glassy carbon working electrode. Pt wire and saturated calomel electrode were employed as the counter and reference electrode, respectively. Measurements were performed in  $10 \text{ mL}$  of  $\text{CO}_2$ -saturated  $0.1 \text{ M KHCO}_3$  containing  $0.1 \text{ M}$  benzylamine. Spectra were collected on a Nicolet 8700 spectrometer (Thermo Fisher Scientific Inc.) during chronoamperometry and were processed by background subtraction and baseline correction.

### ***In situ* Raman measurements**

Confocal Raman microscopy (inVia, Renishaw) with a  $532 \text{ nm}$  laser was used for *in situ* Raman measurements, calibrated against a silicon wafer at  $520.5 \text{ cm}^{-1}$  beforehand. Tests were conducted in a custom single-chamber Teflon electrolytic cell with a circular quartz window. A catalyst-loaded carbon paper electrode ( $1 \text{ mg cm}^{-2}$ ), Pt sheet and saturated calomel electrode acted as working, counter and reference electrodes, respectively. The electrolyte was  $5 \text{ mL}$   $\text{CO}_2$ -saturated  $0.1 \text{ M KHCO}_3$  with  $0.1 \text{ M}$  benzylamine, and potentials were controlled via a CHI660 electrochemical workstation.

### **Online differential electrochemical mass spectrometry (DEMS) measurements**

Online DEMS measurements were carried out in a custom cell.  $\text{CO}_2$ -saturated  $0.1 \text{ M KHCO}_3$  containing  $0.1 \text{ M}$  benzylamine was circulated through the cell using a peristaltic pump. The working

electrode was a graphite sheet coated with catalyst. Platinum gauze and saturated calomel were counter electrode and reference electrode, respectively. All measurements included three consecutive potentiostatic cycles to guarantee reproducibility. Gaseous products and reaction intermediates generated during C-N coupling were pumped into a mass spectrometer for detection.

### **Product quantitation**

The gaseous products were monitored online employing a gas chromatography (GC-2014C, Shimadzu, Japan, H<sub>2</sub> and N<sub>2</sub> carrier) equipped with a thermal conductivity detector, a flame ionization detector, and a methanizer. The aqueous products (formate, N- benzylformamide, and other byproducts) were analyzed by <sup>1</sup>H NMR (Bruker AVANCE-HD 600 MHz). Typically, 500 μL of final catholyte was mixed with 50 μL mixture solution of D<sub>2</sub>O and DMSO (4 μL DMSO was added into 5 g of D<sub>2</sub>O). FE values of the products were calculated with the equation:

$$FE (\%) = \frac{2 * n * F}{Q} * 100$$

where 2 is electron transfer number, n denotes the moles of products, F is Faradaic constant (96485 C mol<sup>-1</sup>), Q represents the total charge accumulated during reaction.

### **Characterization**

Transmission electron microscopy (TEM) and high-resolution TEM (HR-TEM) images were obtained by JEM-2100 (200 kV, JEOL, Japan). The scanning electron microscopy (SEM) was conducted by JSM-7900F (5 kV, JEOL, Japan). High-angle annular dark-field scanning transmission electron microscopy (HAADF-STEM) images were obtained on a 300 kV FEI Titan G2 80-300 microscope with a probe corrector. The inductively coupled plasma mass spectrometry (ICP-MS, Agilent 7800, U.S.A.) was used to determine the content of Sn element in catalysts. X-ray diffraction measurements were performed on Bruker D8 Focus diffractometer equipped with a Cu radiation source ( $\lambda = 1.540598$  nm). The surface coordination analysis of catalyst was performed on an X-ray photoelectron spectroscopy (XPS, Thermo Scientific, U.S.A.) using Al K $\alpha$  target as the excitation source. All XPS binding energies were calibrated against the C 1s reference peak at 284.8 eV.

## Supplementary Figures and Tables

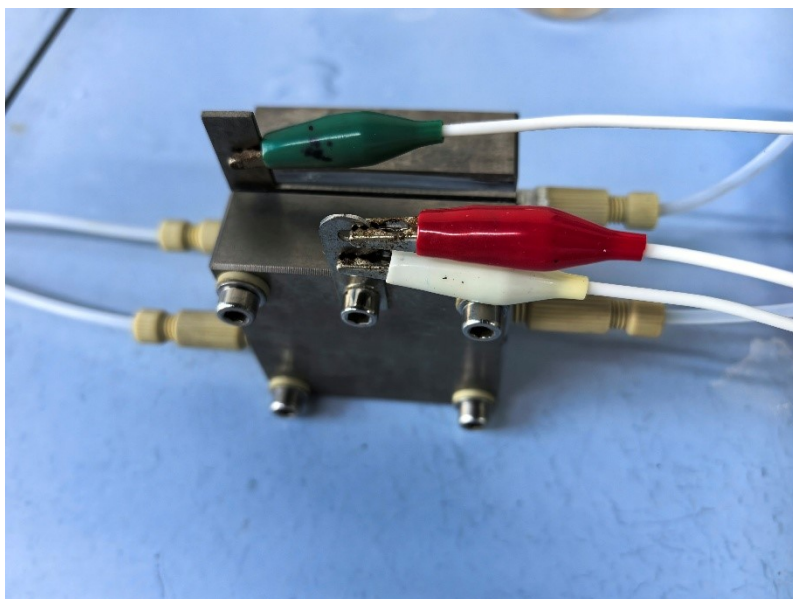

**Fig. S1** The photo of applied MEA reactor.

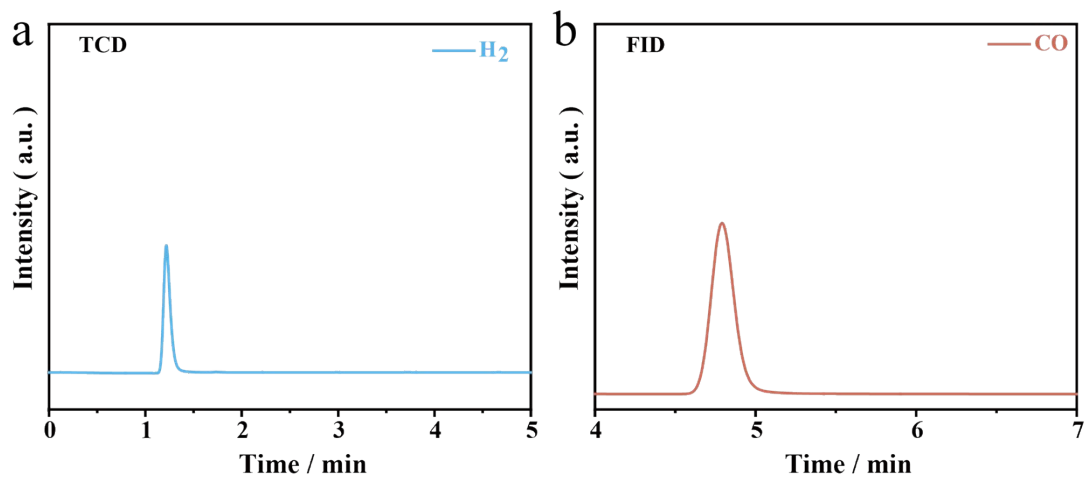

**Fig. S2** The detection for gas products of (a)  $H_2$  in TCD and (b) CO in FID via gas chromatography.

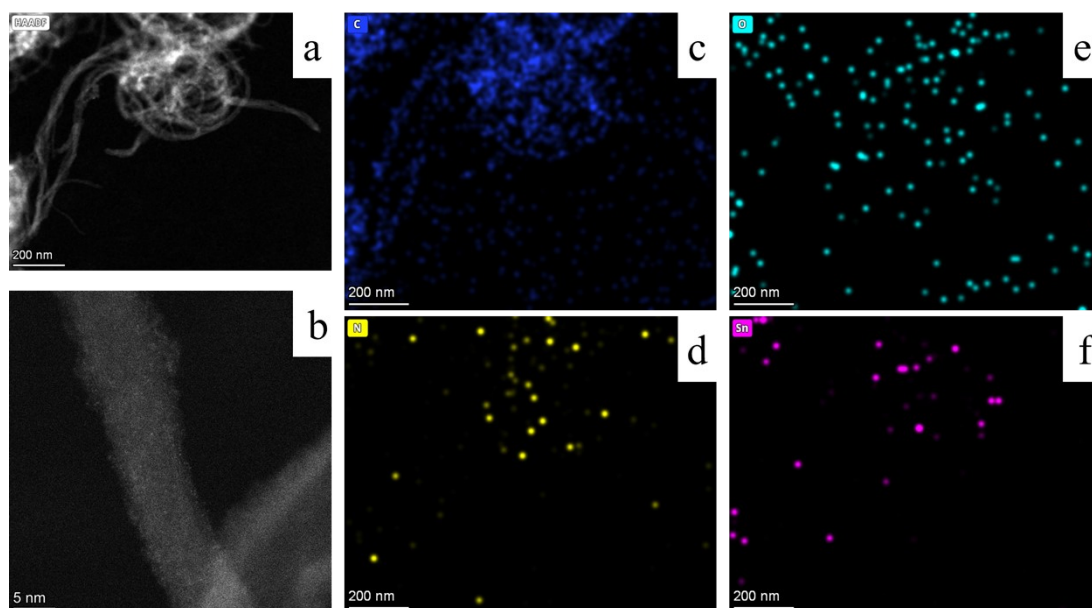

**Fig. S3** HAADF-STEM images and EDS mapping of C-O-SnPc-1 catalyst.

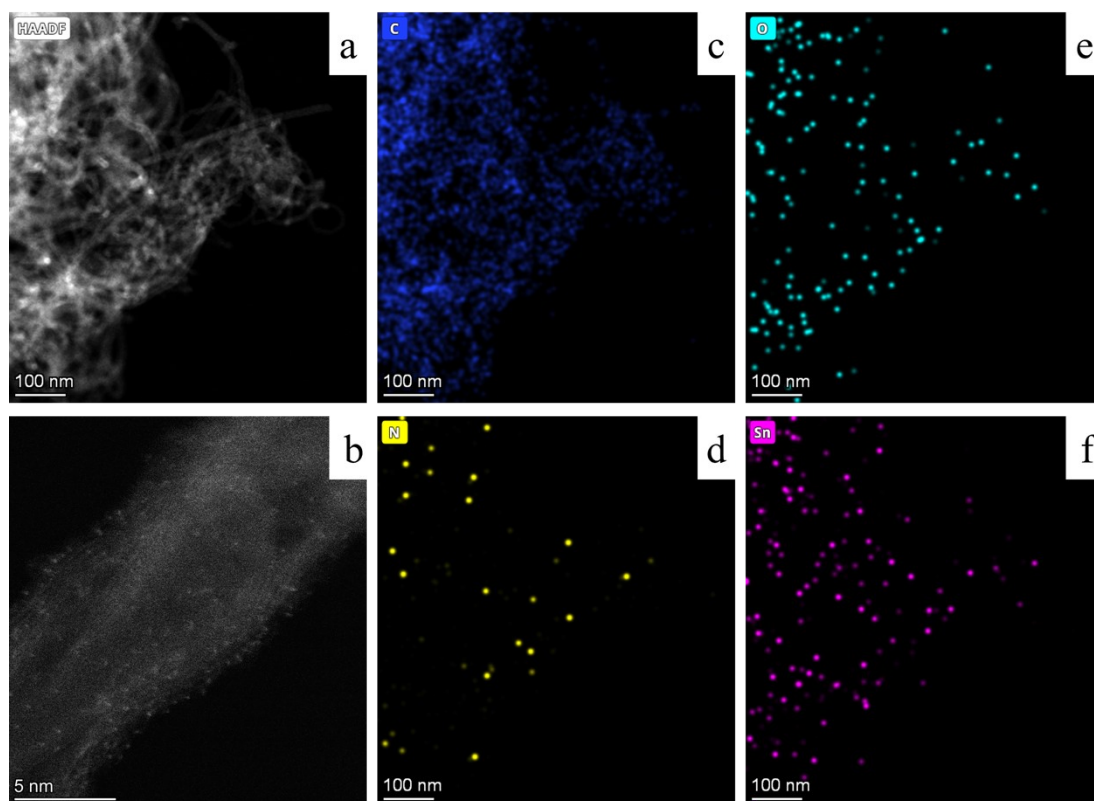

**Fig. S4** HAADF-STEM images and EDS mapping of C-O-SnPc-2 catalyst.

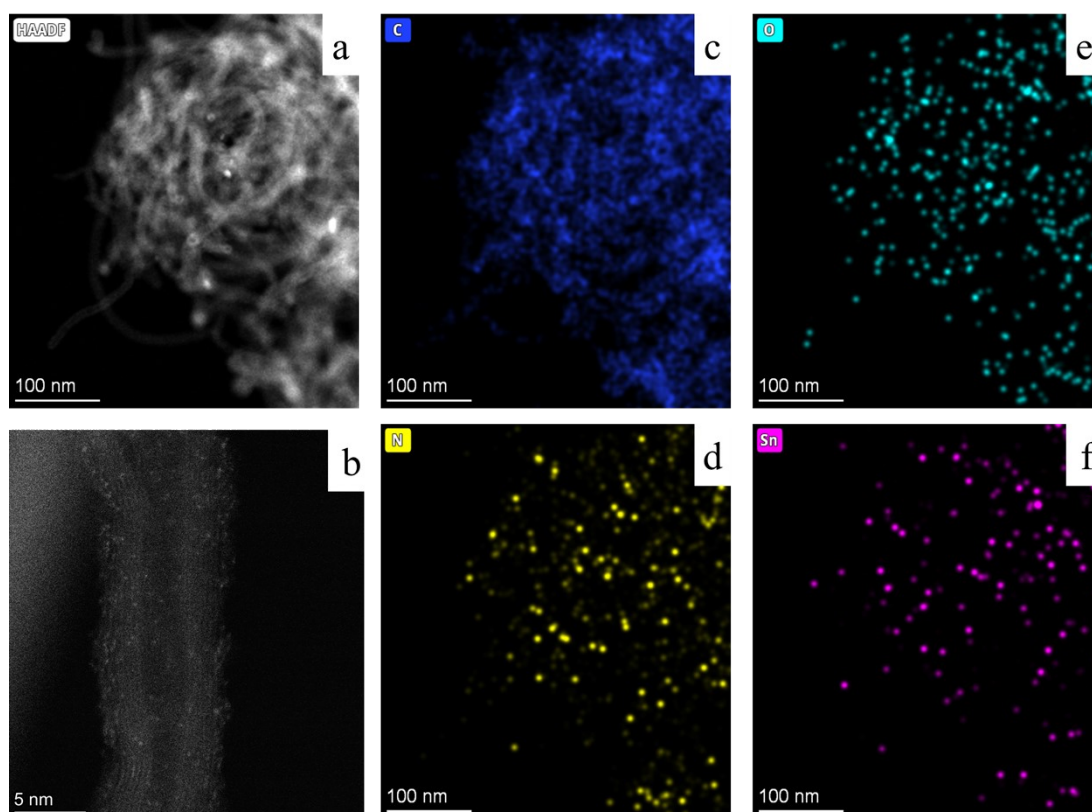

**Fig. S5** HAADF-STEM images and EDS mapping of C-O-SnPc-3 catalyst.

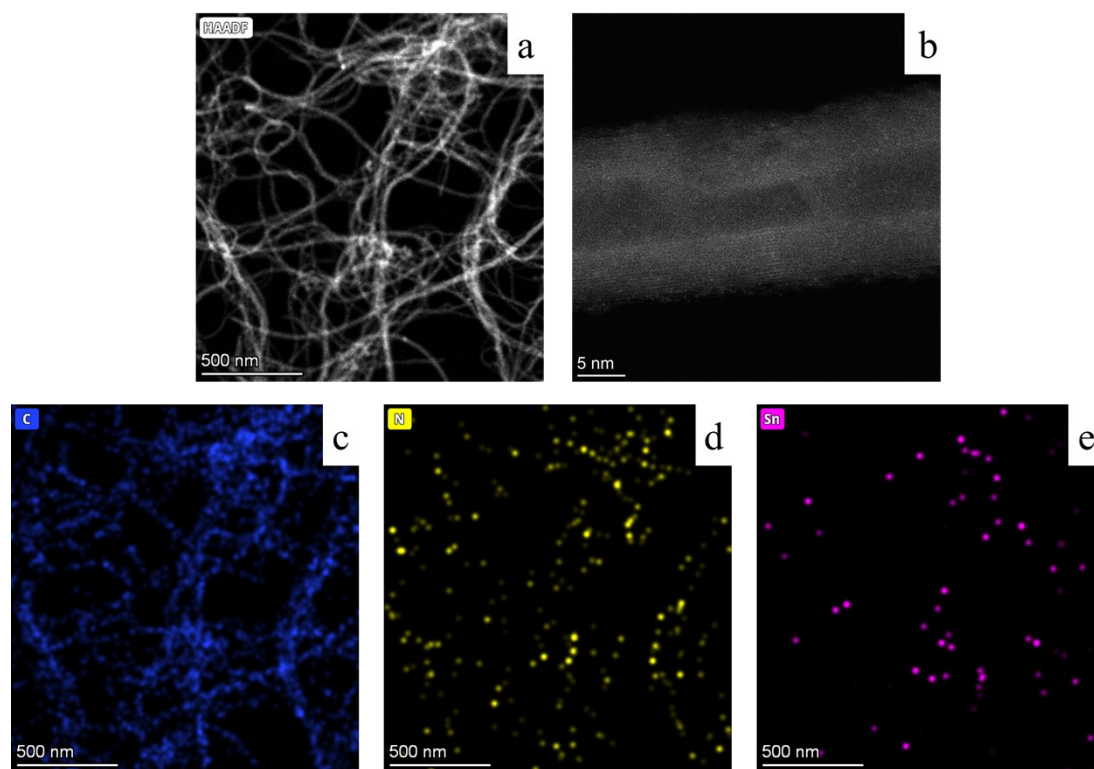

**Fig. S6** HAADF-STEM images and EDS mapping of SnPc/CNT catalyst.

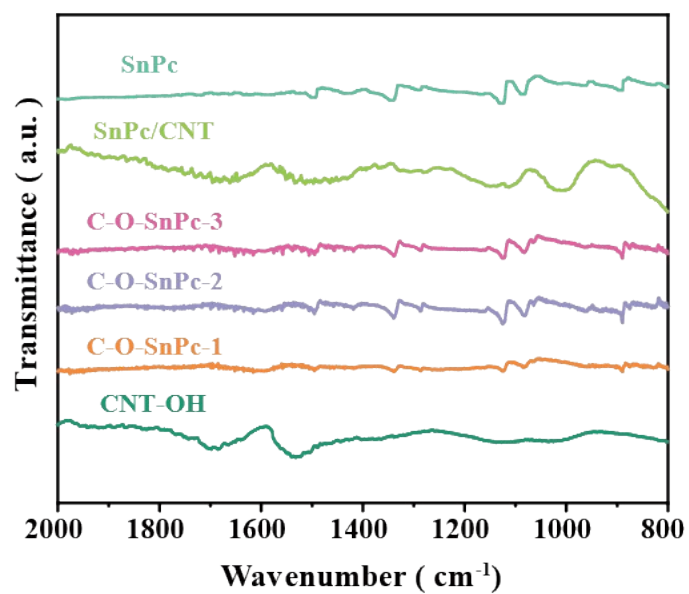

**Fig. S7** FT-IR spectra of CNT-OH, C-O-SnPc-1, C-O-SnPc-2, C-O-SnPc-3, SnPc/CNT, and SnPc catalysts.

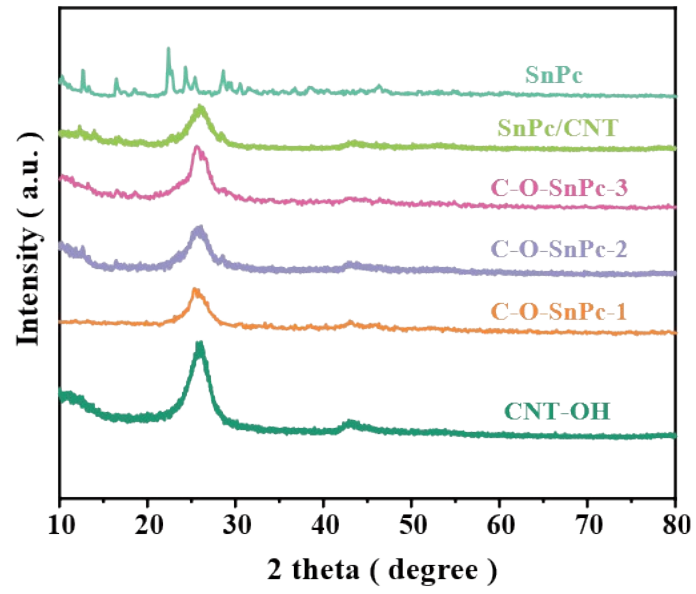

**Fig. S8** XRD patterns of CNT-OH, C-O-SnPc-1, C-O-SnPc-2, C-O-SnPc-3, SnPc/CNT, and SnPc catalysts.

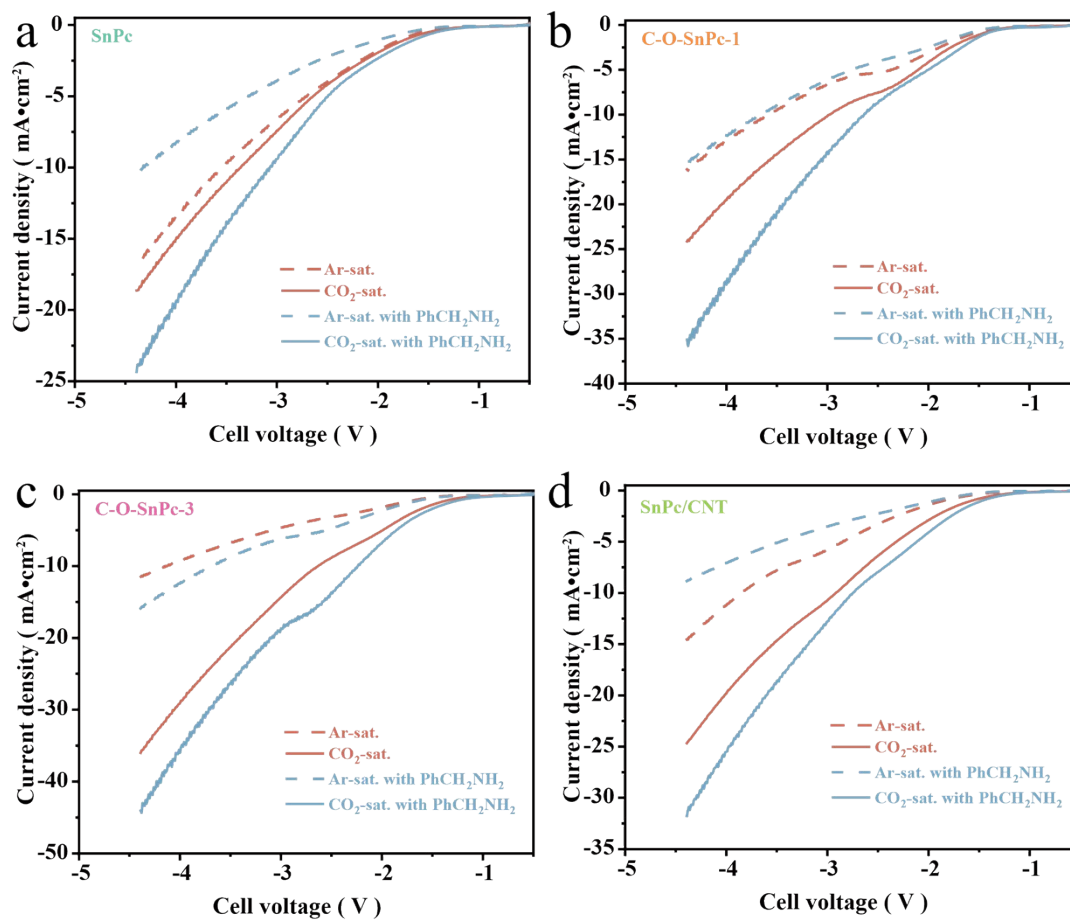

**Fig. S9** LSV curves obtained in four conditions (Ar-saturated 0.1 M KHCO<sub>3</sub>, CO<sub>2</sub>-saturated 0.1 M KHCO<sub>3</sub>, Ar-saturated 0.1 M KHCO<sub>3</sub> containing 0.1 M benzylamine (PhCH<sub>2</sub>NH<sub>2</sub>), and CO<sub>2</sub>-saturated 0.1 M KHCO<sub>3</sub> containing 0.1 M PhCH<sub>2</sub>NH<sub>2</sub>) of (a) SnPc, (b) C-O-SnPc-1, (c) C-O-SnPc-3, and (d) SnPc/CNT catalysts.

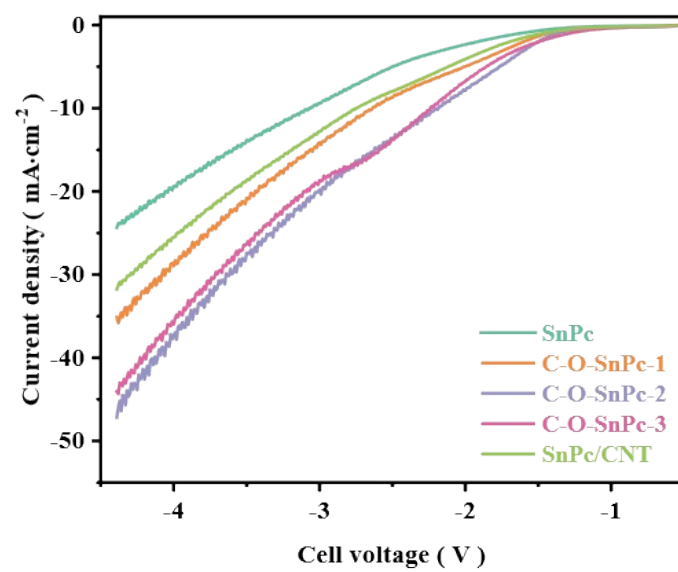

**Fig. S10** LSV curves of catalysts (SnPc, C-O-SnPc-x, and SnPc/CNT) under C-N coupling ( $\text{CO}_2$ -saturated 0.1 M  $\text{KHCO}_3$  containing 0.1 M benzylamine).

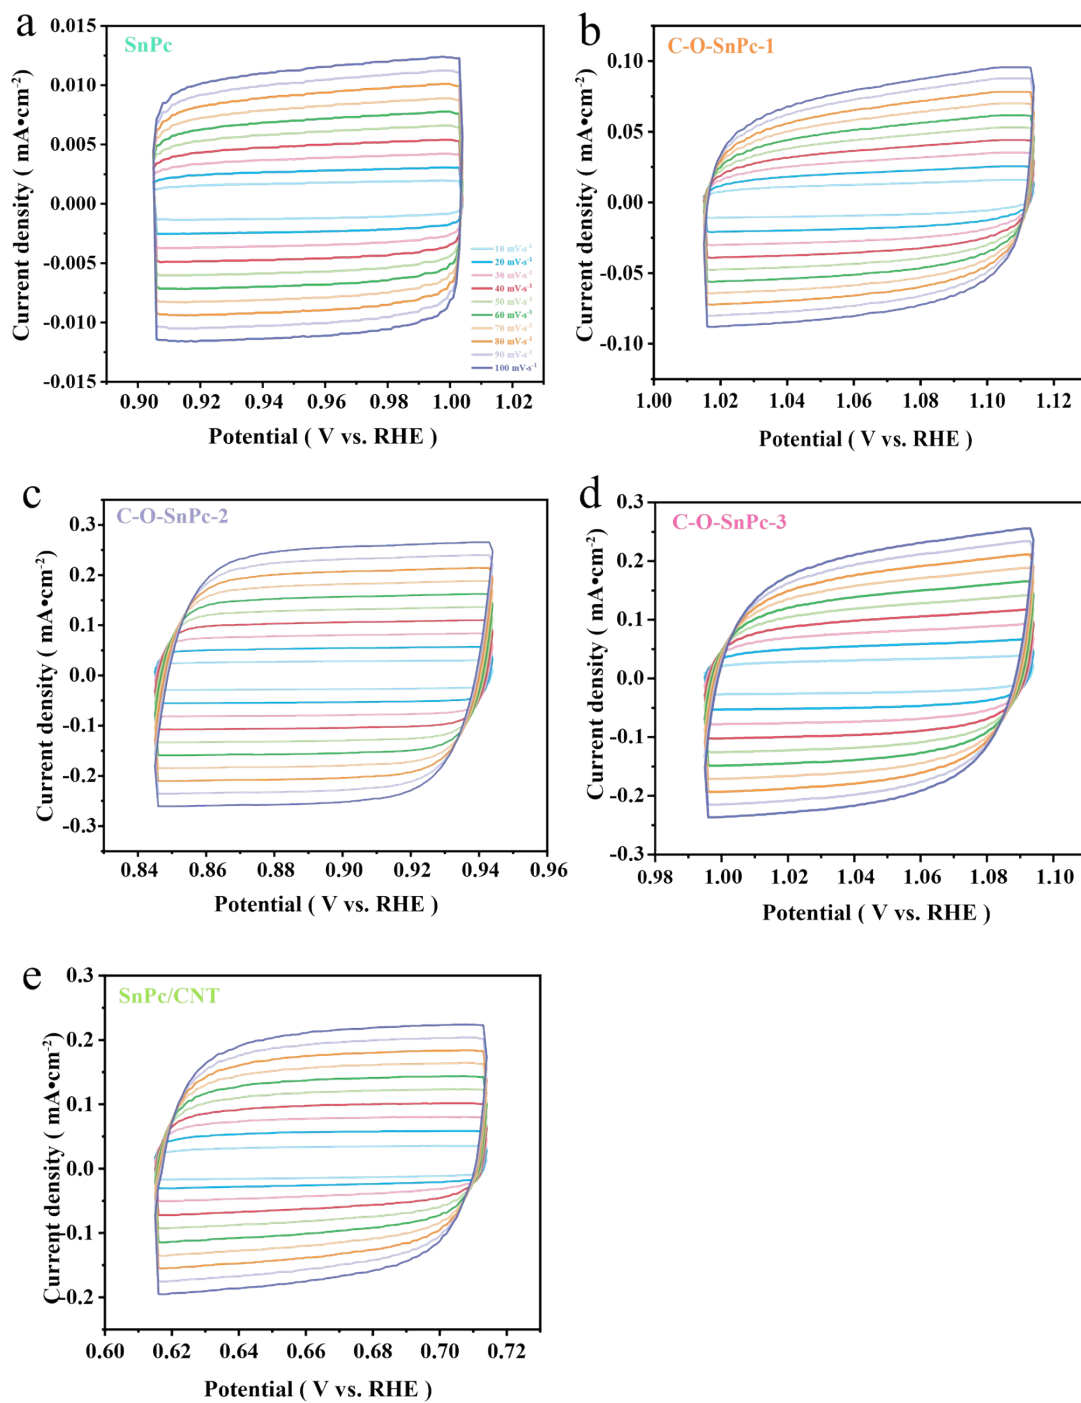

**Fig. S11** CV curves conducted under OCP of (a) SnPc, (b) C-O-SnPc-1, (c) C-O-SnPc-2, (d) C-O-SnPc-3, and (e) SnPc/CNT catalysts at the scan rates of 10 – 100 mV s<sup>-1</sup>.

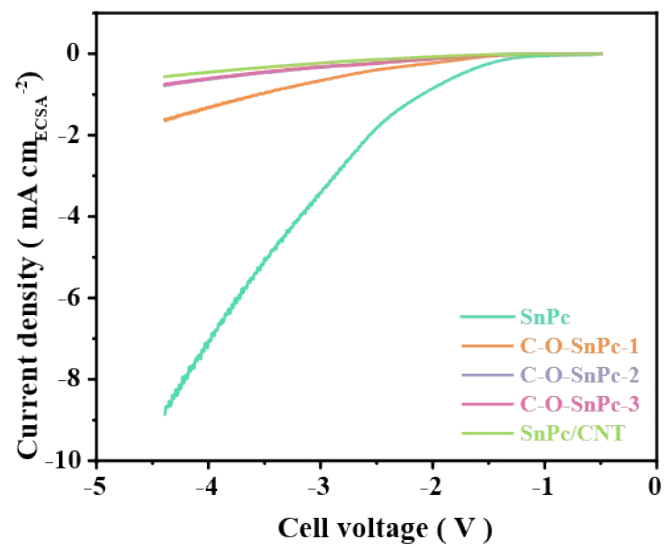

**Fig. S12** LSV curves of catalysts (SnPc, C-O-SnPc-x, and SnPc/CNT) under C-N coupling when the current densities were normalized by ECSA.

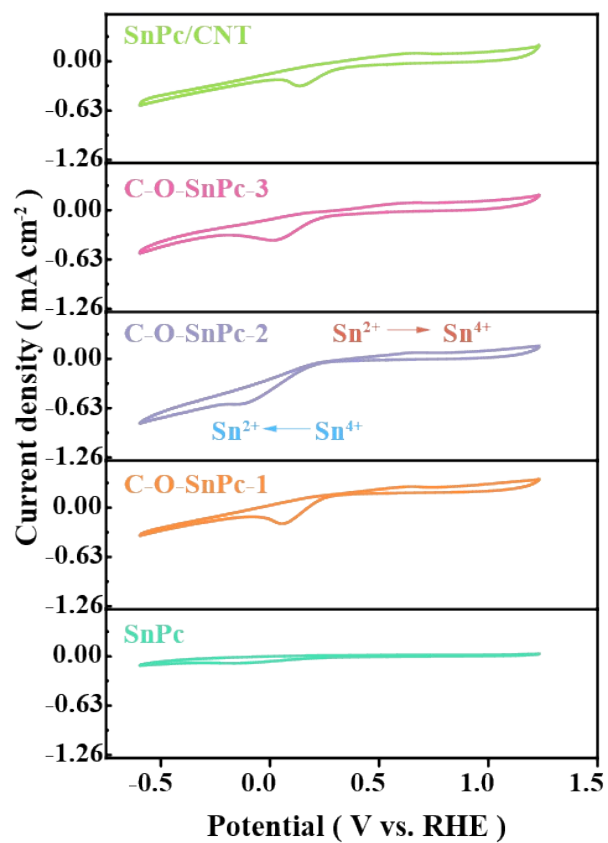

**Fig.S13** CV curves of catalysts in Ar-saturated 0.1 M KHCO<sub>3</sub>.

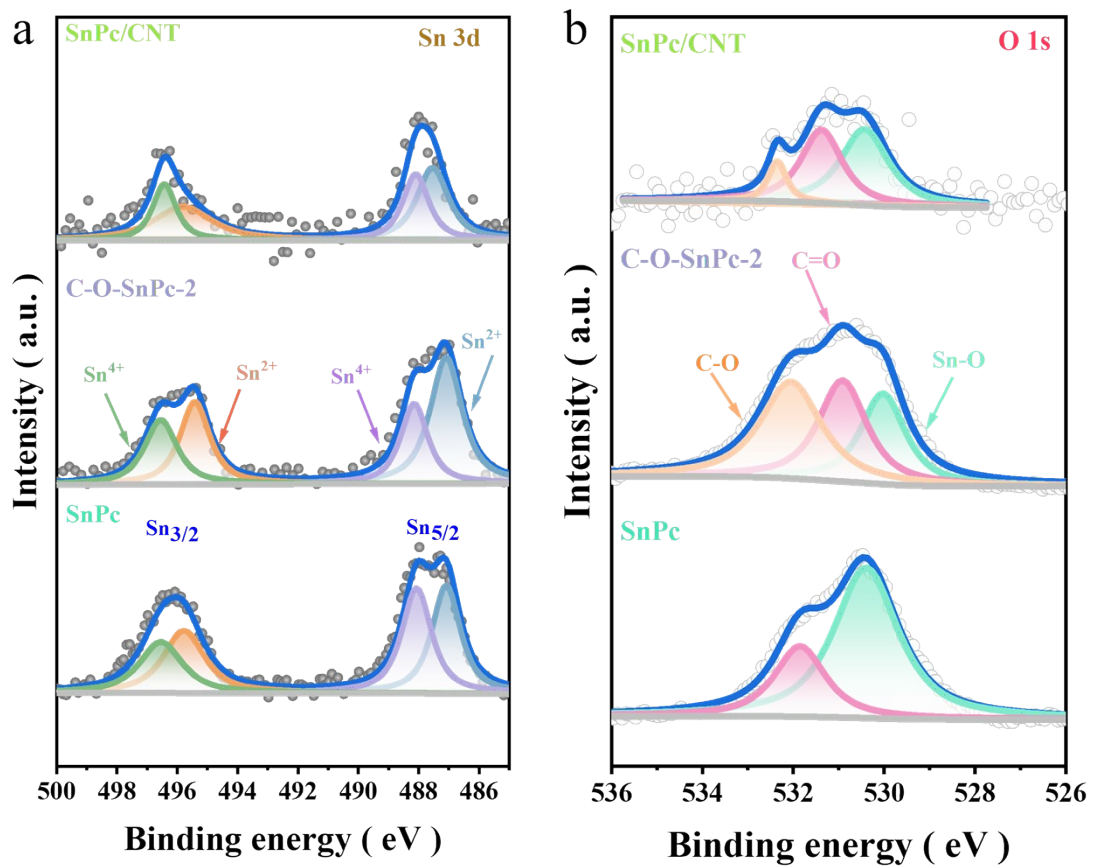

**Fig. S14** (a) Sn 3d and (b) O 1s XPS spectra of SnPc, C-O-SnPc-2, and SnPc/CNT catalysts before electrolysis.

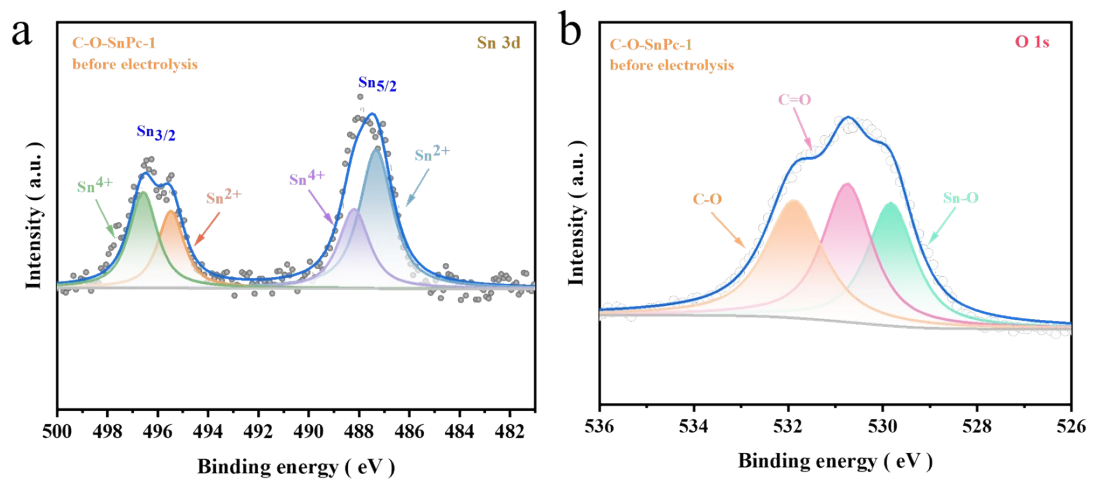

**Fig. S15** (a) Sn 3d and (b) O 1s XPS spectra of C-O-SnPc-1 catalyst before electrolysis.

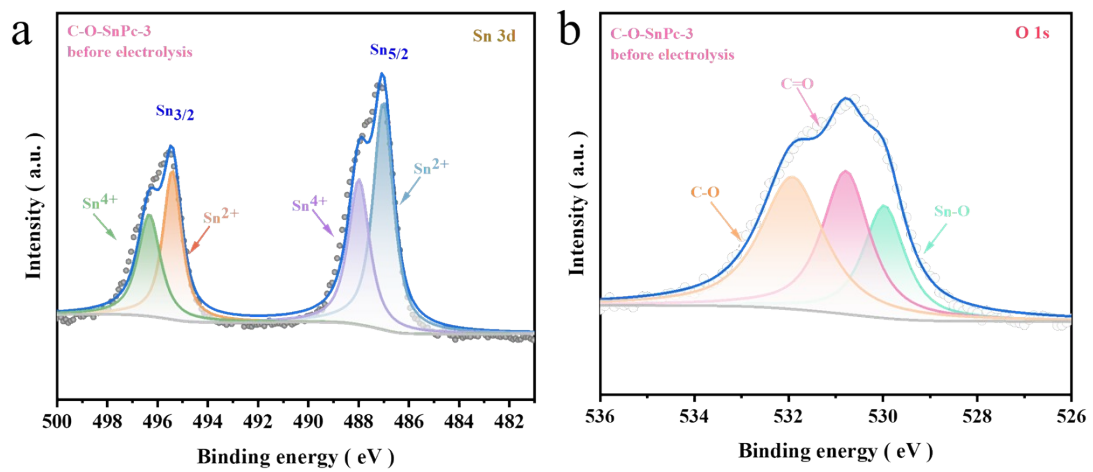

**Fig. S16** (a) Sn 3d and (b) O 1s XPS spectra of C-O-SnPc-3 catalyst before electrolysis.

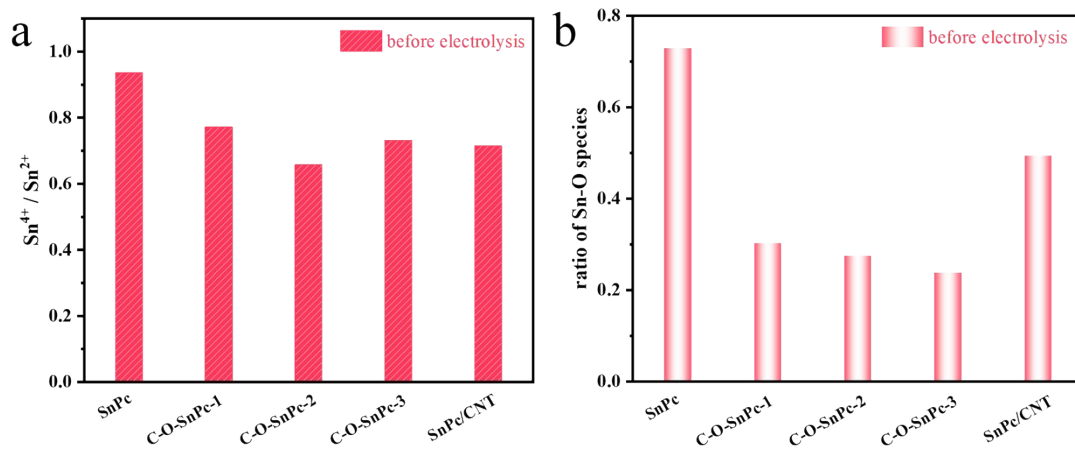

**Fig. S17** (a) Sn<sup>4+</sup>/Sn<sup>2+</sup> ratio and (b) the ratio of Sn-O species calculated from XPS spectra of SnPc, C-O-SnPc-1, C-O-SnPc-2, C-O-SnPc-3, and SnPc/CNT catalysts before electrolysis.

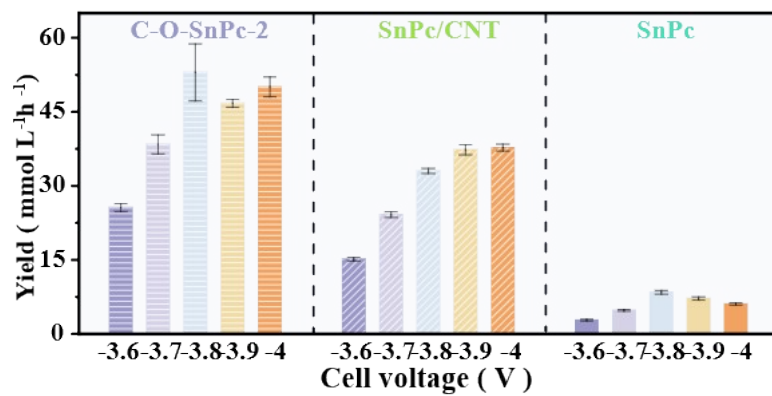

**Fig. S18** Yields for N-benzylformamide of C-O-SnPc-2, SnPc/CNT, and SnPc under different applied cell voltage.

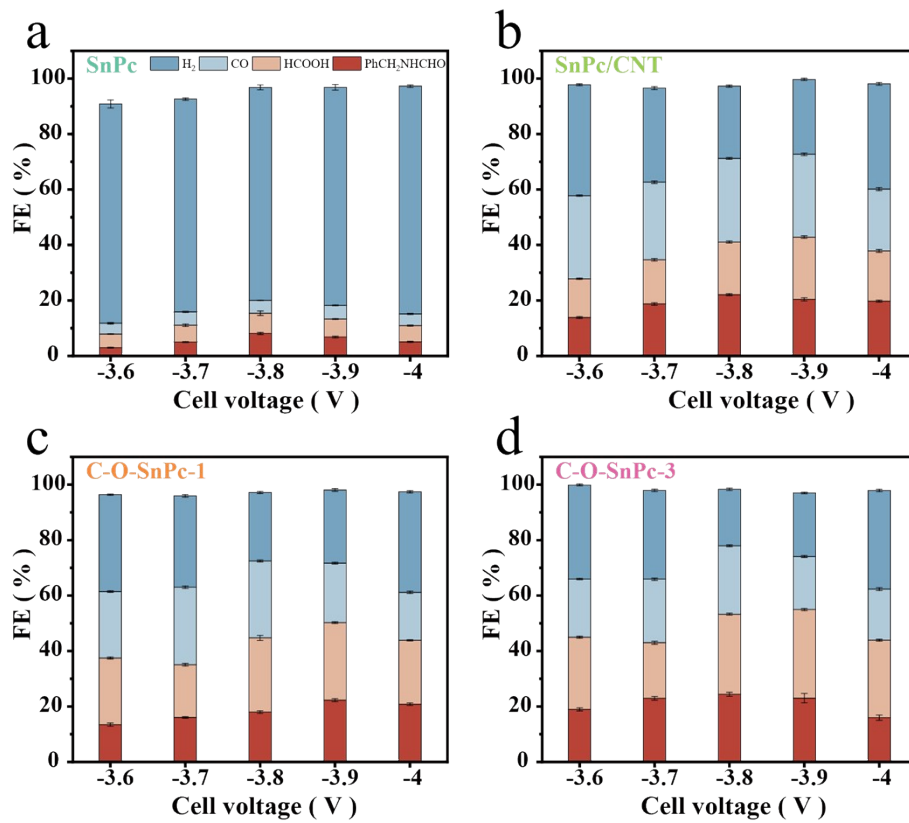

**Fig. S19** FEs for gaseous and liquid products of (a) SnPc, (b) SnPc/CNT, (c) C-O-SnPc-1, and (d) C-O-SnPc-3 under different applied cell voltage.

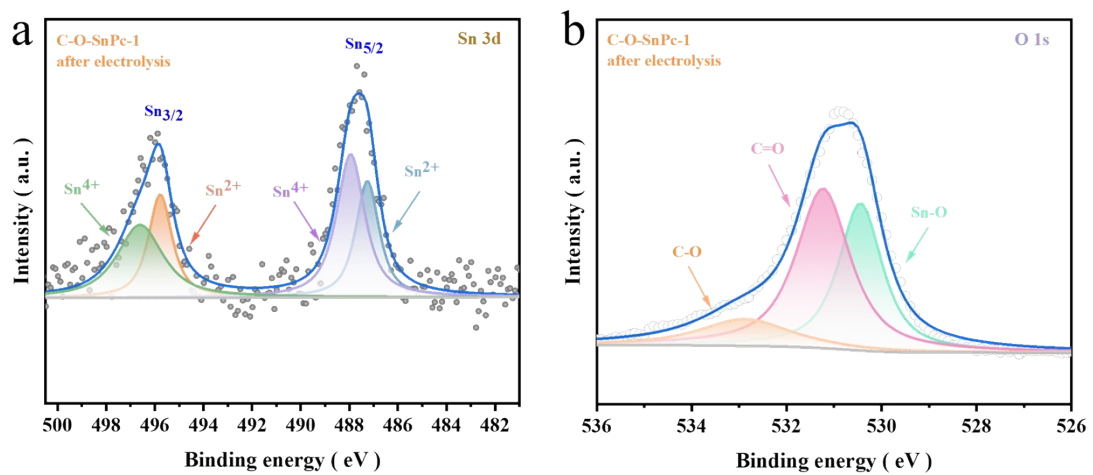

**Fig. S20** (a) Sn 3d and (b) O 1s XPS spectra of C-O-SnPc-1 catalyst after electrolysis.

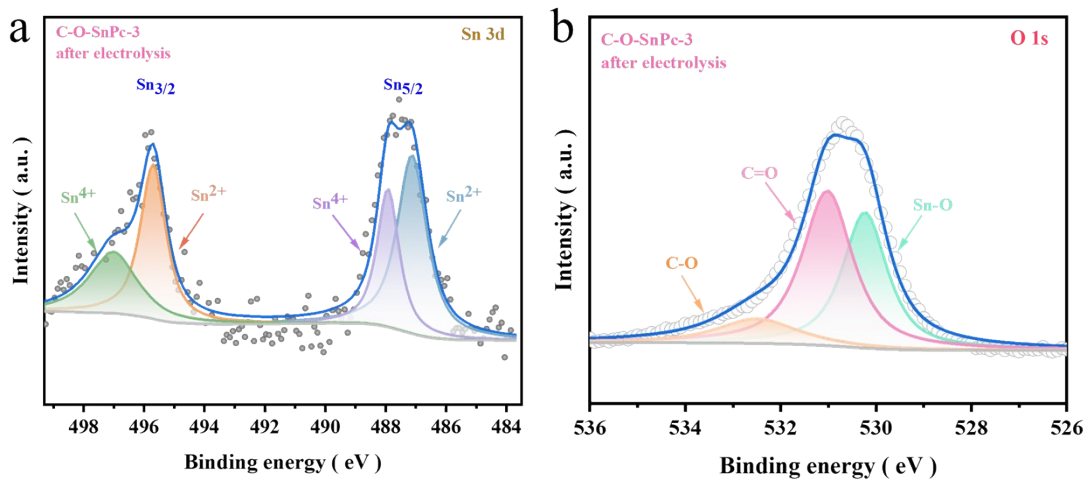

Fig. S21 (a) Sn 3d and (b) O 1s XPS spectra of C-O-SnPc-3 catalyst after electrolysis.

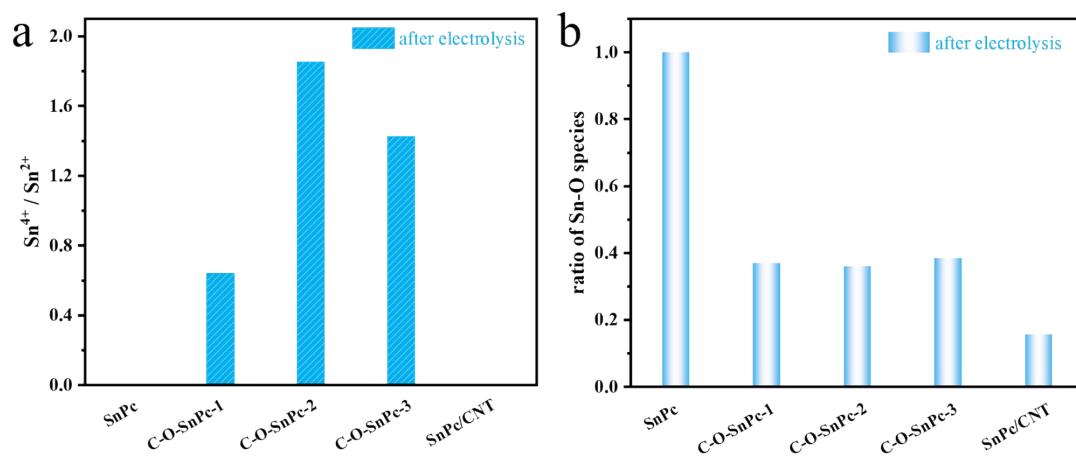

**Fig. S22** (a)  $\text{Sn}^{4+}/\text{Sn}^{2+}$  ratio and (b) the ratio of Sn-O species calculated from XPS spectra of SnPc, C-O-SnPc-1, C-O-SnPc-2, C-O-SnPc-3, and SnPc/CNT catalysts after electrolysis.

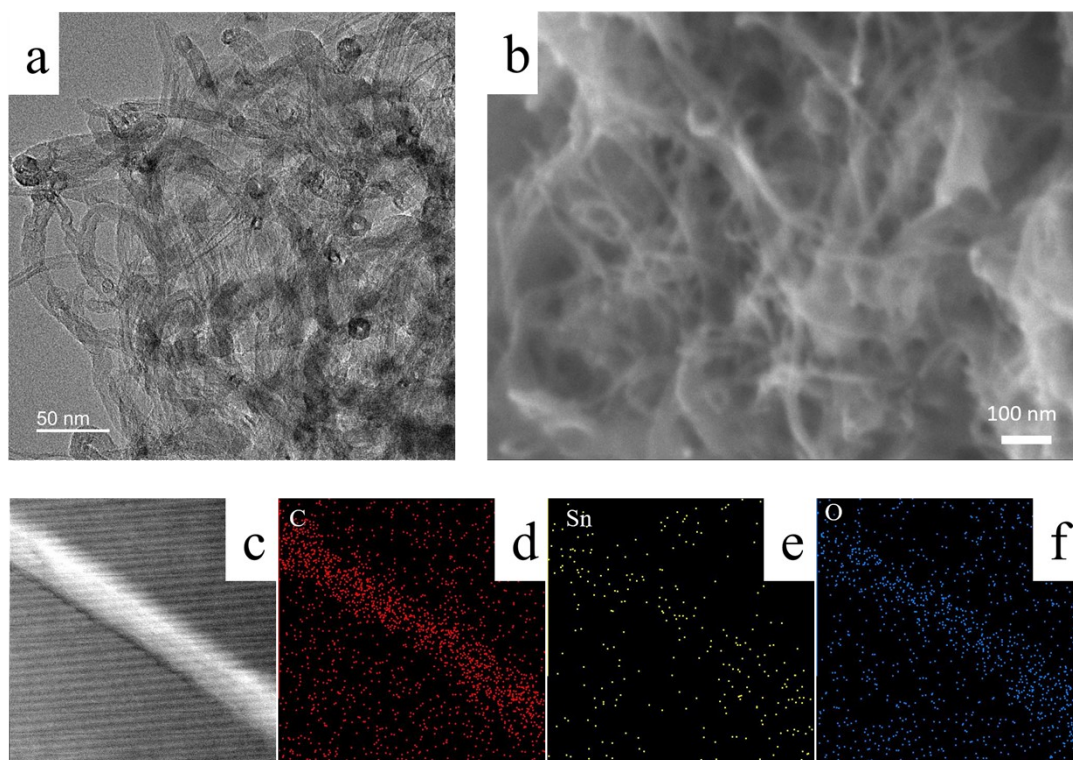

**Fig. S23** (a) TEM image, (b) SEM image and (c–f) EDS mapping of C-O-SnPc-2 catalyst after electrolysis.

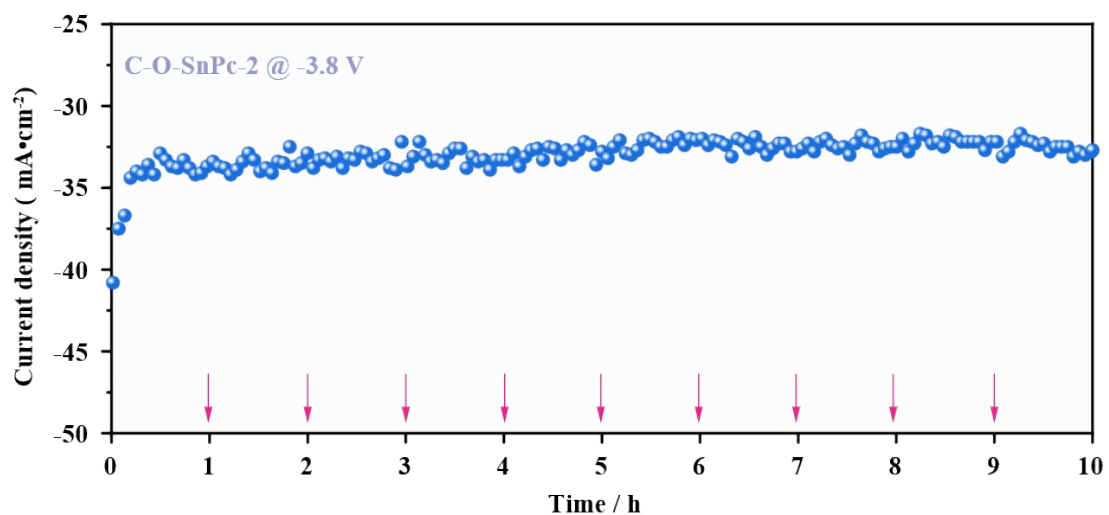

**Fig. S24** Current density in long-term stability of CO<sub>2</sub> and benzylamine C-N coupling on the C-O-SnPc-2 catalyst at a cell voltage of -3.8 V in MEA cell. The vertical arrow denotes the time for electrolyte refreshment.

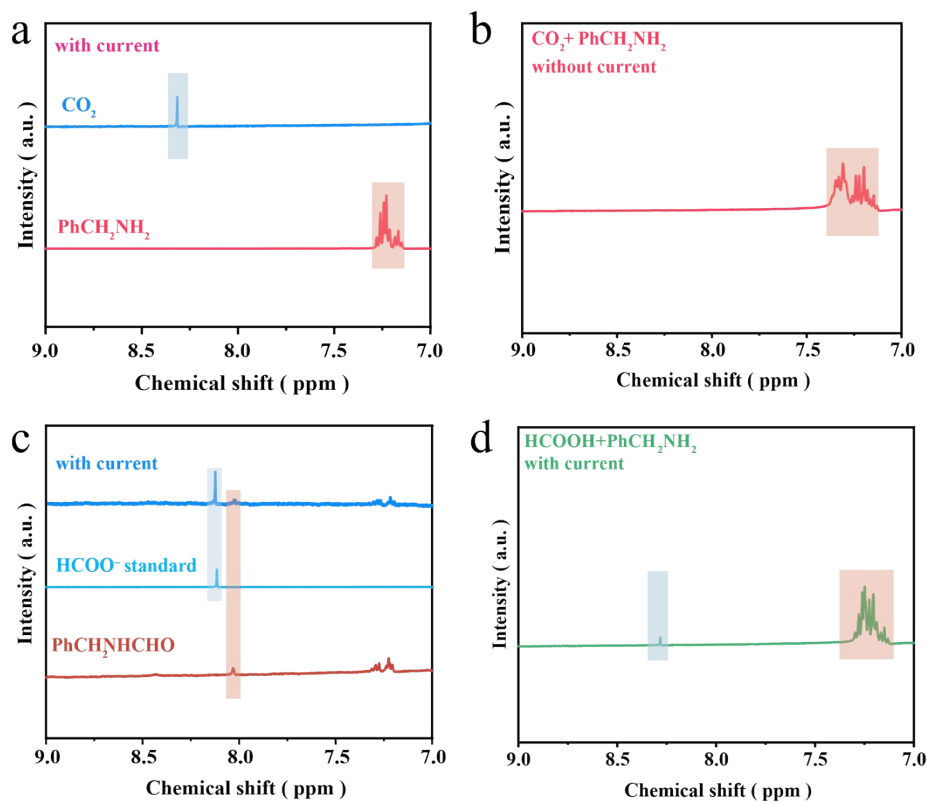

**Fig. S25** (a)  $^1\text{H}$  NMR spectra of C-O-SnPc-2 under applied potential when only  $\text{CO}_2$  or benzylamine ( $\text{PhCH}_2\text{NH}_2$ ) was used as the reactant. (b)  $^1\text{H}$  NMR spectra of C-O-SnPc-2 without current when  $\text{CO}_2$  and  $\text{PhCH}_2\text{NH}_2$  was used. (c)  $^1\text{H}$  NMR spectra of standard references (N-benzylformamide ( $\text{PhCH}_2\text{NHCHO}$ ) and  $\text{HCOO}^-$ ) and C-N coupling under applied potential. (d)  $^1\text{H}$  NMR spectra of C-O-SnPc-2 with current when  $\text{HCOOH}$  and  $\text{PhCH}_2\text{NH}_2$  was used.

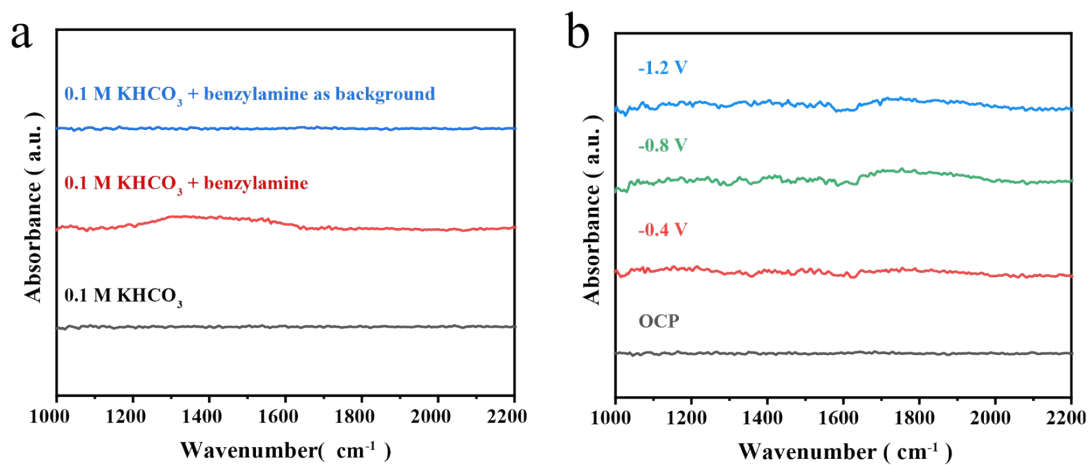

**Fig. S26** (a) FT-IR spectra of different electrolyte in different mode. (b) In situ FT-IR spectra of Ar-saturated electrolyte (0.1 M KHCO<sub>3</sub> + 0.1 M benzylamine) under applied potentials.

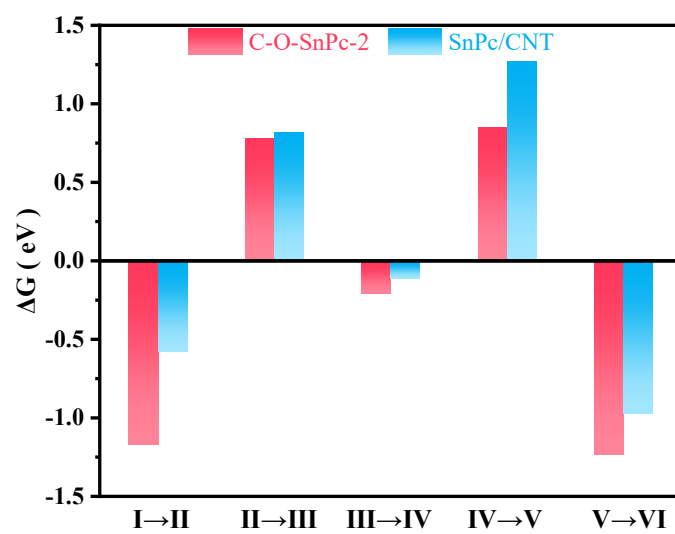

**Fig. S27** Calculated  $\Delta G$  for steps during C-N coupling over C-O-SnPc-2 and SnPc/CNT catalysts.

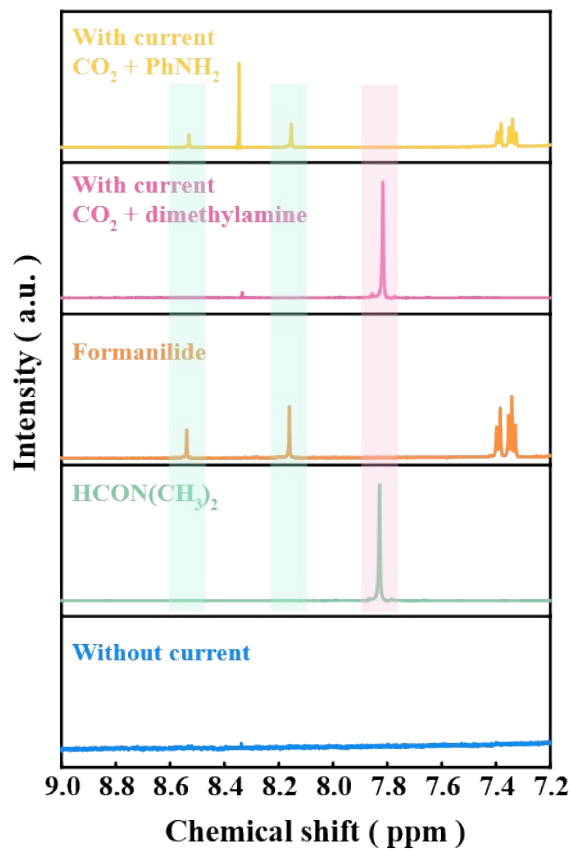

**Fig. S28**  $^1\text{H}$  NMR spectra of pure  $\text{HCON}(\text{CH}_3)_2$  and pure formanilide.  $^1\text{H}$  NMR spectra of C-O-SnPc-2 in electrolyte without current, under  $-3.8$  V when  $\text{CO}_2$  and dimethylamine (or  $\text{PhNH}_2$ ) was used as the reactant.

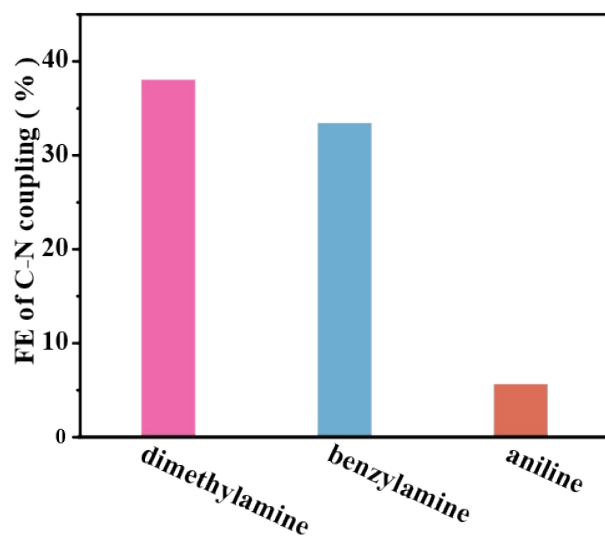

**Fig. S29** FEs of C-N coupling in the substrate tests when dimethylamine, benzylamine and aniline were used as the reactant, respectively.

**Table S1.** Sn content of catalysts determined by EDS mapping and ICP-MS

| Sample     | Sn (at%) by EDS | Sn (wt%) by ICP-MS |
|------------|-----------------|--------------------|
| SnPc       | 1.34            | 12.4               |
| C-O-SnPc-1 | 0.09            | 2.8                |
| C-O-SnPc-2 | 0.18            | 3.9                |
| C-O-SnPc-3 | 0.24            | 4.5                |
| SnPc/CNT   | 0.15            | 3.7                |

**Table S2.** The calculated Cdl and ECSA values for catalysts according to CV curves

| Sample     | Cdl (mF·cm <sup>-2</sup> ) | ECSA (cm <sup>-2</sup> ) |
|------------|----------------------------|--------------------------|
| SnPc       | 0.11                       | 2.75                     |
| C-O-SnPc-1 | 0.87                       | 21.75                    |
| C-O-SnPc-2 | 2.58                       | 64.5                     |
| C-O-SnPc-3 | 2.35                       | 58.75                    |
| SnPc/CNT   | 2.25                       | 56.25                    |

**Table S3.** Summary of FEs for C-N coupling using CO<sub>2</sub> and amines as reactants

| C source        | N source                                                                            | Product                                                                             | Catalyst                                           | FE (%) | Ref       |
|-----------------|-------------------------------------------------------------------------------------|-------------------------------------------------------------------------------------|----------------------------------------------------|--------|-----------|
|                 |    |    | InN <sub>3</sub>                                   | 22.4   | [20]      |
|                 |    |    | CuO/NiAl <sub>2</sub> O <sub>4</sub>               | 29.3   | [23]      |
|                 |    |    | CuO/NiAl <sub>2</sub> O <sub>4</sub>               | 8.8    | [23]      |
|                 |    |    | CuO/NiAl <sub>2</sub> O <sub>4</sub>               | 13.6   | [23]      |
|                 |   |   | CoPc/CNT                                           | 1      | [21]      |
|                 |  |  | CoPc/CNT                                           | 3.4    | [21]      |
| CO <sub>2</sub> |  |  | CoPc/CNT                                           | 2.9    | [21]      |
|                 |  |  | CoPc/CNT                                           | 7.5    | [21]      |
|                 |  |  | CoPc/CNT                                           | 0.6    | [21]      |
|                 |  |  | CoPc/CNT                                           | 2.5    | [21]      |
|                 |  |  | CoN <sub>2</sub> O <sub>2</sub> -(OH) <sub>2</sub> | 13.5   | [5]       |
|                 |  |  | C-O-SnPc                                           | 33.4   | This work |
